# Supplementary material for: Effects of kaolinite layer expansion and impurities on the solid-state reaction of kaolinite
Source: PubMed Central journal article supplement (PMC9043916; doi:10.1039/d1ra07762g), 2021-11-30
Supplement: RA-011-D1RA07762G-s001.pdf [file RA-011-D1RA07762G-s001.pdf]

**Electrical Supporting Information**

# Effects of kaolinite layer expansion and impurities on the solid-state reaction of kaolinite

*Shingo Machida\**, *Ken-ichi Katsumata*, and *Atsuo Yasumori*

Department of Material Science and Technology, Faculty of Advanced Engineering, Tokyo University of Science,

6-3-1 Nijuku, Katsushika-ku, Tokyo 125-8585, Japan

\*E-mail: [shingo.machida@rs.tus.ac.jp](mailto:shingo.machida@rs.tus.ac.jp)

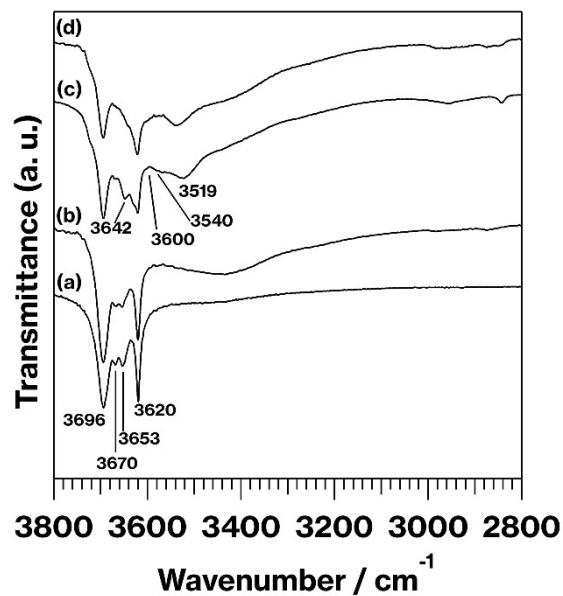

Figure S1. IR spectra in the OH stretching region for (a) GK, (b) GK mixed with  $\text{CaCO}_3$  after grinding, (c) Me-GK, and (d) Me-GK mixed with  $\text{CaCO}_3$  grinding.

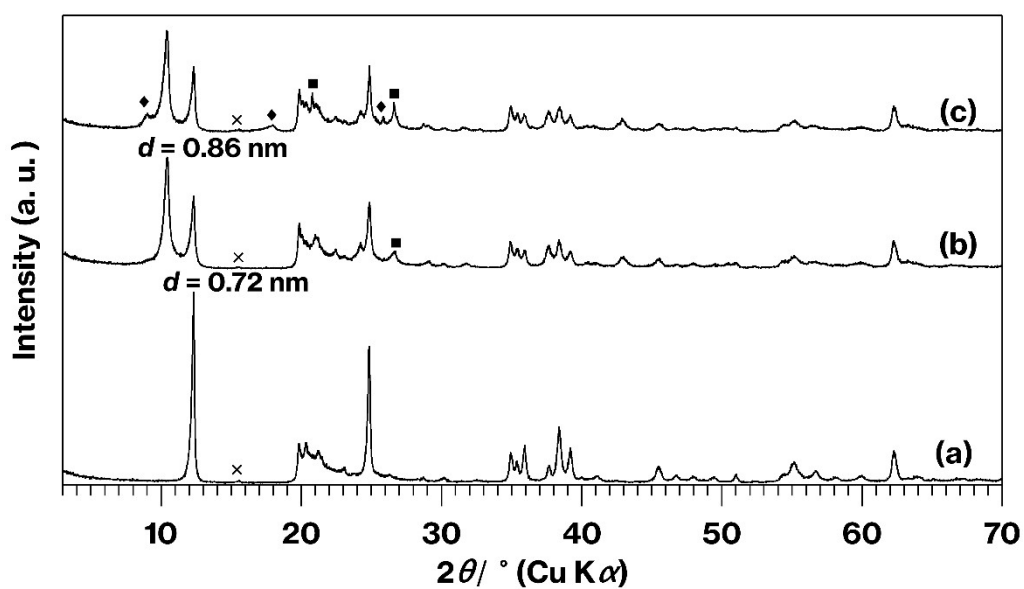

Figure S2. XRD patterns of (a) KP, (b) U-Me-KP, and (c) L-Me-KP. Reflections due to quartz and illite are marked as filled square and diamond, and a cross mark represents an unknown phase.

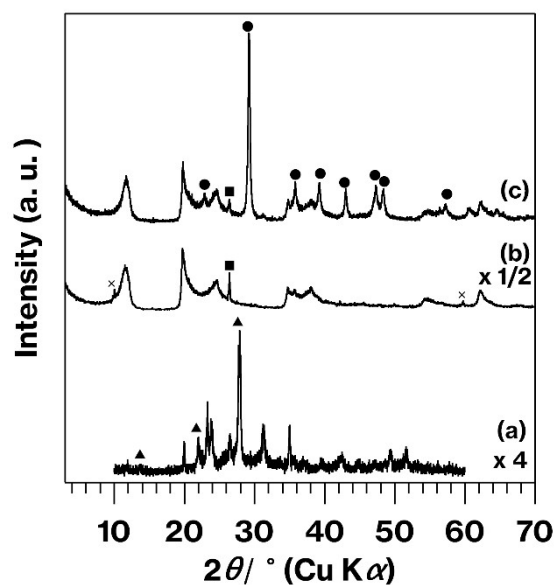

Figure S3. XRD patterns for (a) halloysite+C-4.5 h, (b) halloysite, and (c) ground halloysite mixed with CaCO<sub>3</sub>. Reflections due to anorthite, CaCO<sub>3</sub> and quartz are indicated by filled triangles, circles and squares, respectively, while the cross mark indicates an unknown phase.

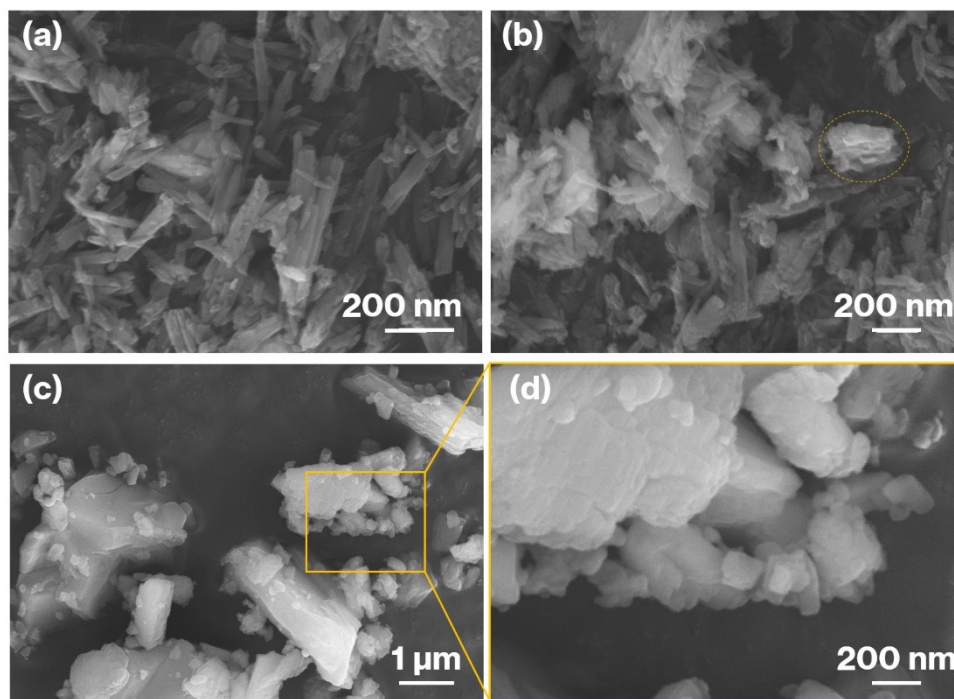

Figure S4. FE-SEM images of (a) halloysite, (b) ground halloysite mixed with CaCO<sub>3</sub> (dashed ellipse indicates a representative CaCO<sub>3</sub> particle), and (c) CaCO<sub>3</sub>, and (d) magnified view of region in orange rectangle shown in (c).
